# Supplementary material for: Expression Analysis and Interaction Protein Screening of CRY1 in Strawberry
Source: MDPI journal article supplement (doi:10.3390/horticulturae8050460), 2022-05-19
Supplement: s1 [file s1]

Supplementary Table S1 Primers used in this study

| Gene          | Application              | Description | Sequences (5'-3')            |
|---------------|--------------------------|-------------|------------------------------|
| <i>FaCRY1</i> | Gene clone               | Forward     | ATGTCAGGTGGTAGTGGTTG         |
|               |                          | Reverse     | TTACCCAGTTTGAGATAGCCG        |
|               | Promoter clone           | Forward     | GGTTCAGGTTTGACAGATTTGATCCG   |
|               |                          | Reverse     | GATCTCTCCTGAACCAAACACTACTGC  |
|               | qPCR                     | Forward     | CCATGGGATGTTAATGATG          |
|               |                          | Reverse     | CACCTGATATGATTCTCTTAG        |
|               | Subcellular localization | Forward     | TCCGCGGCCGCCCCACTAGTATGTCA   |
|               |                          | Reverse     | GGTGGTAGTGGTTGCA             |
|               |                          | Reverse     | TTGCTGCCGCGCGGCACTAGTGACCCA  |
|               |                          |             | GTTTGAGATAGCCGC              |
|               | pGBKT7-CRY1-BD           | Forward     | TGGCCATGGAGGCCGAATTCATGTCAG  |
|               |                          | Reverse     | GTGGTAGTGGTTGCAG             |
|               |                          | Reverse     | TAGTTATGCGGCCGCTGCAGTTACCCA  |
|               |                          |             | GTTTGAGATAGCCGCCTCC          |
|               | Clone CRY1-BD2           | Forward     | ATGTCAGGTGGTAGTGGTTG         |
|               |                          | Reverse     | TGATTCAGAAGACTCTCCGAGCCC     |
|               | pGBKT7-CRY1-BD2          | Forward     | TGGCCATGGAGGCCGAATTCATGTCAG  |
|               |                          | Reverse     | GTGGTAGTGGTTGCAG             |
|               |                          | Reverse     | TAGTTATGCGGCCGCTGCAGTGATTCA  |
|               |                          |             | GAAGACTCTCCGAGCCC            |
|               | Clone CRY1-BD3           | Forward     | TGGCCATGGAGGCCGAATTCATGTCAG  |
|               |                          | Reverse     | GTGGTAGTGGTTGCAG             |
|               |                          | Reverse     | TCTGCTTGGAAGATCCAAAGAACTTTCT |
|               |                          | Forward     | TGGCCATGGAGGCCGAATTCATGTCAG  |
|               | pGBKT7-CRY1-BD3          | Reverse     | GTGGTAGTGGTTGCAG             |
|               |                          | Reverse     | TAGTTATGCGGCCGCTGCAGTCTGCTTG |
|               |                          |             | GAAGATCCAAAGAACTTTCT         |
|               |                          | Forward     | CTTGAGGTTTGTCTTGCAACTG       |
|               | Clone CRY1-BD4           | Reverse     | TTACCCAGTTTGAGATAGCCG        |
|               |                          | Forward     | TGGCCATGGAGGCCGAATTCCTGAGG   |
|               | pGBKT7-CRY1-BD4          | Reverse     | TTTGTCTTGCAACTGGAGC          |
|               |                          | Reverse     | TAGTTATGCGGCCGCTGCAGTTACCCA  |
|               |                          |             | GTTTGAGATAGCCGCCTCC          |
|               |                          | Forward     | AAGAGAATCATATCAGGTGATGCATC   |
|               | Clone CRY1-BD5           | Reverse     | TTACCCAGTTTGAGATAGCCG        |
|               |                          | Forward     | TGGCCATGGAGGCCGAATTCAAGAGAA  |
|               | pGBKT7-CRY1-BD5          | Reverse     | TCATATCAGGTGATGCATCAAGG      |
|               |                          | Reverse     | TAGTTATGCGGCCGCTGCAGTTACCCA  |
|               |                          |             | GTTTGAGATAGCCGCCTCC          |
|               |                          | Forward     | CTGAAATCTATTGGTCTTAGGGAGTATT |
|               | Clone CRY1-BD6           | Reverse     | C                            |
|               |                          | Reverse     | TTACCCAGTTTGAGATAGCCG        |

|                   |                                  |         |                                          |
|-------------------|----------------------------------|---------|------------------------------------------|
|                   | pGBKT7-CRY1-BD6                  | Forward | TGGCCATGGAGGCCGAATTCTTTCTGA              |
|                   |                                  | Reverse | AATCTATTGGTCTTAGGGAGTATTCAAG             |
|                   | Overexpression                   | Forward | TAGTTATGCGGCCGCTGCAGTTACCCA              |
|                   |                                  | Reverse | GTTTGAGATAGCCGCCTCC                      |
| <i>CSN5A-like</i> | Gene clone                       | Forward | tttacgaacgatagggtaccATGTCAGGTGGTAGT      |
|                   |                                  | Reverse | GGTTGCAG                                 |
|                   | pGADT7- <i>CSN5A-like</i>        | Forward | tgatTTTTgcggacTCTAGATTACCCAGTTTGA        |
|                   |                                  | Reverse | GATAGCCGCCT                              |
| <i>JAZ5</i>       | Gene clone                       | Forward | atggatgcggaaatagcgag                     |
|                   |                                  | Reverse | tcaactttcaatcattggctcagg                 |
|                   | pGADT7- <i>JAZ5</i>              | Forward | CCATGGAGGCCAGTGAATTCatggatgcgga          |
|                   |                                  | Reverse | aatagcgag                                |
| <i>NDUFB9</i>     | Gene clone                       | Forward | AGCTCGAGCTCGATGGATCCtcaactttcaatc        |
|                   |                                  | Reverse | attggctcagg                              |
|                   | pGADT7- <i>JAZ5</i>              | Forward | atggccgagagatccaac                       |
|                   |                                  | Reverse | ctatagcctgagtccaagctgc                   |
| <i>eIF3G</i>      | Gene clone                       | Forward | CCATGGAGGCCAGTGAATTCatggccgaga           |
|                   |                                  | Reverse | gatccaac                                 |
|                   | pGADT7- <i>eIF3G</i>             | Forward | AGCTCGAGCTCGATGGATCCctatagcctgag         |
|                   |                                  | Reverse | ttcaagctgc                               |
| <i>NF-YC9</i>     | Gene clone                       | Forward | atgagcggagtttcaacg                       |
|                   |                                  | Reverse | ctaggcattatcttctcgcca                    |
|                   | pGADT7- <i>NF-YC9</i>            | Forward | CCATGGAGGCCAGTGAATTCatgagcggagt          |
|                   |                                  | Reverse | ttcaacg                                  |
| <i>Actin</i>      | Housekeeping gene for strawberry | Forward | AGCTCGAGCTCGATGGATCCctaggcattatc         |
|                   |                                  | Reverse | ttctcgcca                                |
|                   | pGADT7- <i>eIF3G</i>             | Forward | atggctttagtgcgaccag                      |
|                   |                                  | Reverse | ctaattcgccctgggtgt                       |
| <i>Kanamycin</i>  | Detection                        | Forward | CCATGGAGGCCAGTGAATTCatggctttagtgcgaccag  |
|                   |                                  | Reverse | AGCTCGAGCTCGATGGATCCctaattcgccctgggtgt   |
|                   | pGADT7- <i>NF-YC9</i>            | Forward | atggatcagcaaggacatgg                     |
|                   |                                  | Reverse | ctaatgatcagatgggtgattgctg                |
|                   | Housekeeping gene for strawberry | Forward | CCATGGAGGCCAGTGAATTCatggatcagcaaggacatgg |
|                   |                                  | Reverse | AGCTCGAGCTCGATGGATCCctaatgatcaga         |
|                   | Detection                        | Forward | tggtgattgctg                             |
|                   |                                  | Reverse | CCGGGTTTGCTGGAGATGAT                     |
|                   | Housekeeping gene for strawberry | Forward | CTTTTGGATTGAGCCTCGTC                     |
|                   |                                  | Reverse | CTCTGATGCCGCCGTGTTT                      |
|                   | Detection                        | Forward | CATTCGCCGCCAAGCTCTTC                     |
|                   |                                  | Reverse | CTTTTGGATTGAGCCTCGTC                     |

|                |                                  |         |                         |
|----------------|----------------------------------|---------|-------------------------|
| <i>NtCOP1</i>  | qPCR                             | Forward | GCTTGTGGTCATAGTTTCTGC   |
|                |                                  | Reverse | TTGCACCTCATTTAGTTCATC   |
| <i>NtHY5</i>   | qPCR                             | Forward | CCATCAAGCAGCGAGAGGTC    |
|                |                                  | Reverse | GCATTAGAACCACCACCACC    |
| <i>NtActin</i> | Housekeeping<br>gene for tobacco | Forward | CATCAGGAAGGACTTGTACGG   |
|                |                                  | Reverse | GATGGACCTGACTCGTCATAC   |
| <i>NtCO</i>    | qPCR                             | Forward | CCCGCATAACATGCAGCAAACCT |
|                |                                  | Reverse | TATCAGCGTCGCAGGAGGCACA  |
