# Supplementary material for: Expression Analysis and Interaction Protein Screening of CRY1 in Strawberry
Source: MDPI journal article supplement (doi:10.3390/horticulturae8050460), 2022-05-19
Supplement: s1 [file s1]

Supplementary Table S2. Coding region sequences of *FaCRY1*

| Gene          | Sequences (2022 bp)                                                                                                                                                                                                                                                                                                                                                                                                                                                                                                                                                                                                                                                                                                                                                                                                                                                                                                                                                                                                                                                                                                                                                                                                                                                                                                                                                                                                                                                                                                                                                                                                                                                                                                                                                                                                                                                                                                                                                                                                                                                                                                                                                                                                                                                            |
|---------------|--------------------------------------------------------------------------------------------------------------------------------------------------------------------------------------------------------------------------------------------------------------------------------------------------------------------------------------------------------------------------------------------------------------------------------------------------------------------------------------------------------------------------------------------------------------------------------------------------------------------------------------------------------------------------------------------------------------------------------------------------------------------------------------------------------------------------------------------------------------------------------------------------------------------------------------------------------------------------------------------------------------------------------------------------------------------------------------------------------------------------------------------------------------------------------------------------------------------------------------------------------------------------------------------------------------------------------------------------------------------------------------------------------------------------------------------------------------------------------------------------------------------------------------------------------------------------------------------------------------------------------------------------------------------------------------------------------------------------------------------------------------------------------------------------------------------------------------------------------------------------------------------------------------------------------------------------------------------------------------------------------------------------------------------------------------------------------------------------------------------------------------------------------------------------------------------------------------------------------------------------------------------------------|
| <i>FaCRY1</i> | ATGTCAGGTGGTAGTGGTTGCAGTGTAGTTTGGTTCAGGAGAGATCTGAG<br>GGTTGAAGACAATCCAGCTTTGTTAGCTGGAGTTAGAGCAGGAGGAGTT<br>GTTGCTCTTTTTATTTGGGCACCTGAGGAGGAAGGGCCTTTTTACCCAGGA<br>AGGGTCTCAAGGTGGTGGCTCAAACACAGTTTGGCACATCTTGATTCCTC<br>TTTGAGAAGTTTGGGCACTCCTCTCATCACCAAAAAATCTACTGACAGTG<br>TTTCTTCTCTTCTTGAGGTTTGTCTTGCAACTGGAGCCACTCAGCTCTTCTT<br>CAACCACTTATATGATCCTATATCACTGGTTAGAGATCACAGGGCCAAGG<br>AGGTTTTGTCCGCCAACGGCATAACTGTGCGTTCCTTTAACGCCGATTTGC<br>TCTATGAACCATGGGATGTTAATGATGTCCACGGTCGTCCATTACAAACCT<br>TTGATGCTTTTTGGGAAAGATGCCTCAGCATGCCCTTTGATCCAGAGGCA<br>CCACTTCTCCCCCCTAAGAGAATCATATCAGGTGATGCATCAAGGTGTCCT<br>CCTGATACATTGGTTTTTTGAAGATGAATCAGAGAAGGGAAGCAATGCGCT<br>ACTTGCTCGAGCATGGTCACCTGGGTGGAGCAGTGCTGATAAGGCAGTA<br>ACCACATTTATTAATGGTCCATTGATCGAGTATTCCACAAACCGCAGAAA<br>GGCTGATAGTAATACAACCTTCACTGCTTTCTCCCCATTTGCATTTTGGGGA<br>GGTAAGTGTCAGAAAAGTATTTTCATCTTATACGCATCAAGCAGTTGCTTTG<br>GGCCAATGAAGGTAACAAGGCTGGTGAAGAGAGTGTGAACCTTGTTTCTG<br>AAATCTATTGGTCTTAGGGAGTATTCAAGATACATTAGTTTCAATCATCCTT<br>ACAGTCATGAAAGACCTCTTCTTGGGCACCTAAAATTCTTCCCCTGGGTT<br>ATAAATCAGAACTATTTCAAGGCATGGAGGCAAGGTCCGAAGTGGCTATCC<br>GTTGGTGGATGCTGGCATGAGAGAATTGTGGGCTACTGGCTGGCTGCATG<br>ATCGGATACGAGTTGTTGTTTCTAGTTTCTTCGTAAAGGTTCTGCAGCTCC<br>CGTGGAGGTGGGGAATGAAGTATTTCTGGGACACACTCTTAGATGCTGAT<br>CTTGAAAGTGATGCTCTTGGTTGGCAGTATATATCCGGCACTATCCCTGAT<br>GGGCGTGAGTTTGACCGCATAGATAATCCACAGTTTGAGGGTTACAAGTG<br>TGATCCACATGGAGAATATGTGCGAAGGTGGCTTCCTGAACTATCCAGGC<br>TACCAACTGACTGGATACACCACCCATGGAATGCACCAGAGTCTGTACTC<br>CAGGCAGCTGGAATTGAACTTGGATCAAATTACCCCCCTTCTATTGTAGG<br>AATAGAAGCAGCAAAATCCAGGTTGCAAGAAGCGTTAACTGAAATGTGG<br>CAGCATGAACGAGCCGCTGCTGAGAATGGAAGTGAAGAAGGGCTCGGA<br>GAGTCTTCTGAATCAACCTCCATTGCGTTTCCTGAAGACATACAAATGGA<br>GGATAGTCATGAACAGGTGAGGAATAACCCTCCTCCTCCAACCTCGACGCT<br>ATGAGGATCAGATGGTCCCTAGTATCACTACTTCCCTCGTGCGAGTTGAA<br>GAGGAAGAAAGTTCTTTGGATCTTCCAAGCAGAGCTGAAGTGCCTACAA<br>ATGTTACTGGGGATCAAGAACCAATGAGAGACACAATGAACCAAGAGG<br>GTTTTCAGCCTAATCATAACAACACTCCACCACAACCTAATACTACACTA<br>ACCCTGCAGTATGTTGTTGAAGATTTCGACGGCGGAATCGTCTAGCAGTAC<br>TAGGAGAGAGAGGGATGGAGGCGTAGTTCCAGTTTGGTCTCCTTCAAATT<br>CTAGCTACTCAGAGCAGTTTGTGAGTGATGAAAATGGCATTGCAACAAGT<br>TCTTACTTGCAGAGACATCCTCAGTCTCACCAAATAATGAATTGGAGGCG<br>GCTATCTCAAACCTGGGTAA |
